# Supplementary material for: Phylogenetic Patterns of Extinction Risk in the Endemic Flora of a Mediterranean Hotspot as a Guiding Tool for Preemptive Conservation Actions
Source: Frontiers journal article supplement (doi:10.3389/fevo.2020.571587), 2020-10-23
Supplement: Table_1.XLSX [file Table_1.XLSX]

## Sheet: Hoja2
Table S1. IUCN status of angiosperm plant species that are endemic to the Iberian Peninsula
Species	IUCN status
Aconitum napellus subsp. castellanum	VU
Aconitum variegatum subsp. pyrenaicum	VU
Adenocarpus anisochilus	LC
Adenocarpus argyrophyllus	LC
Adenocarpus aureus	LC
Adenocarpus desertorum	NT
Adenocarpus gibbsianus	CR
Adenocarpus hispanicus	LC
Adenocarpus lainzii	LC
Aegonychon gastoni	EN
Aethionema monospermum	LC
Alchemilla acutiformis	DD
Alchemilla albinervia	EN
Alchemilla angustiserrata	DD
Alchemilla aranica	DD
Alchemilla atriuscula	NT
Alchemilla atropurpurea	CR
Alchemilla benasquensis	EN
Alchemilla borderei	DD
Alchemilla burgensis	VU
Alchemilla catalaunica	LC
Alchemilla crenulata	DD
Alchemilla diluta	EN
Alchemilla espotensis	NT
Alchemilla frost-olsenii	EN
Alchemilla fulgens	VU
Alchemilla fulgida	VU
Alchemilla hispanica	VU
Alchemilla hoppeaniformis	DD
Alchemilla hypercycla	NT
Alchemilla ilerdensis	DD
Alchemilla impedicellata	EN
Alchemilla iniquiformis	NT
Alchemilla iratiana	DD
Alchemilla ischnocarpa	DD
Alchemilla lainzii	DD
Alchemilla legionensis	DD
Alchemilla macrochira	NT
Alchemilla melanoscytos	EN
Alchemilla microcephala	VU
Alchemilla montserratii	NT
Alchemilla mystrostigma	EN
Alchemilla nafarroana	CR
Alchemilla nieto-felineri	DD
Alchemilla nudans	DD
Alchemilla oscensis	VU
Alchemilla ozana	NT
Alchemilla paupercula	DD
Alchemilla perspicua	NT
Alchemilla polatschekiana	VU
Alchemilla polita	EN
Alchemilla polychroma	EN
Alchemilla rugulosa	EN
Alchemilla santanderiensis	EN
Alchemilla serratisaxatilis	DD
Alchemilla sierrae	DD
Alchemilla spathulata	NT
Alchemilla spectabilior	EN
Alchemilla subalpina	DD
Alchemilla tenerifolia	NT
Alchemilla villarii	EN
Alchemilla vizcayensis	EN
Allium grosii	VU
Allium melananthum	LC
Allium palentinum	LC
Allium pruinatum	VU
Allium pyrenaicum	NT
Allium rouyi	CR
Allium schmitzii	VU
Allium stearnii	LC
Anarrhinum duriminium	LC
Anarrhinum longipedicellatum	LC
Anchusa calcarea subsp. calcarea	DD
Anchusa calcarea subsp. losadae	LC
Anchusa puechii	VU
Anchusa undulata subsp. granatensis	LC
Anchusa undulata subsp. undulata	LC
Androsace cantabrica	EN
Androsace ciliata	LC
Androsace cylindrica subsp. cylindrica	NT
Androsace cylindrica subsp. hirtella	VU
Androsace cylindrica subsp. willkommii	VU
Androsace laggeri	LC
Androsace pyrenaica	NT
Androsace rioxana	EN
Androsace vitaliana subsp. assoana	VU
Androsace vitaliana subsp. flosjugorum	NT
Anemone pavoniana	LC
Anemone trifolia subsp. albida	NT
Angelica major	LC
Angelica pachycarpa	LC
Angelica razulii	LC
Anthyllis hystrix	NT
Anthyllis onobrychioides	NT
Anthyllis ramburii	NT
Anthyllis rupestris	CR
Anthyllis tejedensis subsp. plumosa	VU
Anthyllis vulneraria subsp. arundana	LC
Anthyllis vulneraria subsp. balearica	NT
Anthyllis vulneraria subsp. microcephala	LC
Antirrhinum braun-blanquetii	LC
Antirrhinum charidemi	CR
Antirrhinum controversum	LC
Antirrhinum graniticum	LC
Antirrhinum grosii	LC
Antirrhinum linkianum	EN
Antirrhinum litigiosum	LC
Antirrhinum lopesianum	EN
Antirrhinum meonanthum	LC
Antirrhinum microphyllum	VU
Antirrhinum molle	LC
Antirrhinum mollissimum	LC
Antirrhinum onubense	NT
Antirrhinum pertegasii	EN
Antirrhinum pulverulentum	LC
Antirrhinum sempervirens	NT
Antirrhinum subbaeticum	EN
Antirrhinum valentinum	VU
Aphanes lusitanica	NE
Apium bermejoi	CR
Aquilegia pyrenaica subsp. cazorlensis	EN
Aquilegia pyrenaica subsp. discolor	NT
Aquilegia pyrenaica subsp. guarensis	VU
Aquilegia pyrenaica subsp. pyrenaica	LC
Aquilegia viscosa subsp. hirsutissima	LC
Aquilegia vulgaris subsp. hispanica	LC
Aquilegia vulgaris subsp. nevadensis	NT
Aquilegia vulgaris subsp. paui	CR
Arabis juressi	VU
Arabis margaritae	CR
Arabis sadina	LC
Arabis soyeri subsp. soyeri	VU
Arabis stenocarpa	LC
Arenaria aggregata subsp. pseudoarmeriastrum	DD
Arenaria alfacarensis	NT
Arenaria algarbiensis	LC
Arenaria arcuatociliata	VU
Arenaria armerina subsp. caesia	LC
Arenaria arundana	LC
Arenaria capillipes	NT
Arenaria cavanillesiana	LC
Arenaria conimbricensis subsp. conimbricensis	LC
Arenaria conimbricensis subsp. viridis	NT
Arenaria delaguardiae	VU
Arenaria erinacea	LC
Arenaria favargeri	VU
Arenaria fontqueri subsp. fontqueri	LC
Arenaria fontqueri subsp. hispanica	LC
Arenaria grandiflora subsp. bolosii	CR
Arenaria grandiflora subsp. glabrescens	LC
Arenaria grandiflora subsp. incrassata	LC
Arenaria modesta subsp. tenuis	LC
Arenaria montana subsp. intricata	LC
Arenaria nevadensis	CR
Arenaria obtusiflora subsp. ciliaris	LC
Arenaria obtusiflora subsp. obtusiflora	EN
Arenaria oscensis	LC
Arenaria querioides	LC
Arenaria racemosa	VU
Arenaria retusa	LC
Arenaria tetraquetra subsp. amabilis	LC
Arenaria tetraquetra subsp. murcica	LC
Arenaria tetraquetra subsp. tetraquetra	VU
Arenaria tomentosa	VU
Arenaria valentina	LC
Arenaria vitoriana	NT
Aristolochia bianorii	VU
Armeria alboi	LC
Armeria alliacea subsp. alliacea	NT
Armeria alliacea subsp. matritensis	LC
Armeria arenaria subsp. confusa	LC
Armeria arenaria subsp. segoviensis	LC
Armeria arenaria subsp. vestita	DD
Armeria beirana	LC
Armeria berlengensis	EN
Armeria bigerrensis subsp. bigerrensis	NT
Armeria bigerrensis subsp. losae	VU
Armeria bigerrensis subsp. microcephala	VU
Armeria bourgaei subsp. bourgaei	DD
Armeria bourgaei subsp. lanceobracteata	DD
Armeria bourgaei subsp. willkommiana	NT
Armeria bubanii	NT
Armeria caballeroi	VU
Armeria caespitosa	LC
Armeria cantabrica	LC
Armeria capitella	VU
Armeria castellana	LC
Armeria castroviejoi	LC
Armeria ciliata	NT
Armeria colorata	EN
Armeria duriaei	LC
Armeria eriophylla	NE
Armeria euscadiensis	NT
Armeria fontqueri	VU
Armeria gaditana	VU
Armeria genesiana subsp. belmonteae	VU
Armeria genesiana subsp. genesiana	VU
Armeria godayana	NT
Armeria hirta	EN
Armeria hispalensis	VU
Armeria humilis subsp. humilis	EN
Armeria humilis subsp. odorata	EN
Armeria langei subsp. daveaui	DD
Armeria langei subsp. langei	LC
Armeria linkiana	VU
Armeria macrophylla	VU
Armeria malacitana	VU
Armeria merinoi	CR
Armeria muelleri	LC
Armeria neglecta	EX
Armeria pauana	DD
Armeria pinifolia	VU
Armeria pseudoarmeria	VU
Armeria pubigera	NT
Armeria pubinervis	NT
Armeria quichiotis	VU
Armeria rothmaleri	VU
Armeria rouyana	NT
Armeria ruscinonensis subsp. littorifuga	NT
Armeria salmantica	LC
Armeria sampaioi	VU
Armeria splendens	VU
Armeria trachyphylla	EN
Armeria transmontana	NT
Armeria velutina	CR
Armeria villosa subsp. alcaracensis	VU
Armeria villosa subsp. bernisii	LC
Armeria villosa subsp. carratracensis	VU
Armeria villosa subsp. longiaristata	LC
Armeria villosa subsp. provillosa	LC
Armeria villosa subsp. villosa	EN
Armeria welwitschii	NE
Arum pictum subsp. sagittifolium	NT
Asparagus macrorrhizus	CR
Asperula cynanchica subsp. pyrenaica	NT
Asperula hirta	LC
Asperula paui subsp. dianensis	VU
Asperula paui subsp. paui	VU
Asphodelus aestivus	LC
Asphodelus albus subsp. carpetanus	LC
Asphodelus bento-rainhae subsp. bento-rainhae	EN
Asphodelus bento-rainhae subsp. salmanticus	DD
Asphodelus lusitanicus	NT
Asphodelus serotinus	LC
Astragalus alopecuroides subsp. grosii	NT
Astragalus balearicus	VU
Astragalus cavanillesii	CR
Astragalus clusianus	LC
Astragalus gines-lopezii	EN
Astragalus hispanicus	LC
Astragalus nevadensis subsp. muticus	NT
Astragalus nitidiflorus	CR
Astragalus tremolsianus	CR
Astragalus turolensis	NT
Athamanta hispanica	VU
Baldellia alpestris	LC
Baldellia repens subsp. baetica	LC
Bellevalia dubia subsp. hackelii	LC
Berberis vulgaris subsp. seroi	LC
Biarum carratracense	LC
Biarum mendax	LC
Biscutella fontqueri	LC
Biscutella glacialis	NT
Biscutella lyrata	LC
Biscutella sempervirens subsp. sempervirens	LC
Biscutella sempervirens subsp. vicentina	EN
Boleum asperum	LC
Borderea chouardii	CR
Borderea pyrenaica	LC
Brassica balearica	NT
Brassica repanda subsp. almeriensis	VU
Brassica repanda subsp. blancoana	LC
Brassica repanda subsp. cadevallii	LC
Brassica repanda subsp. cantabrica	NT
Brassica repanda subsp. dertosensis	NT
Brassica repanda subsp. gypsicola	LC
Brassica repanda subsp. latisiliqua	VU
Brassica repanda subsp. maritima	LC
Brassica repanda subsp. nudicaulis	LC
Brimeura amethystina	LC
Brimeura duvigneaudii subsp. duvigneaudii	CR
Brimeura duvigneaudii subsp. occultata	CR
Bunium balearicum	LC
Bunium macuca subsp. macuca	VU
Bunium macuca subsp. nivale	LC
Bupleurum acutifolium	VU
Bupleurum angulosum	LC
Bupleurum barceloi	NT
Bupleurum fruticescens subsp. fruticescens	LC
Calamintha rouyana	VU
Campanula adsurgens	LC
Campanula affinis	LC
Campanula arvatica	LC
Campanula cantabrica	NT
Campanula decumbens	LC
Campanula herminii	NT
Campanula jaubertiana	LC
Campanula lusitanica subsp. specularioides	EN
Campanula precatoria	LC
Campanula semisecta	LC
Cardamine pratensis subsp. nuriae	LC
Cardamine raphanifolia subsp. gallaecica	VU
Carduncellus balearicus	VU
Carduncellus cuatrecasasii	LC
Carduncellus dianius	VU
Carduncellus hispanicus subsp. araneosus	NT
Carduncellus hispanicus subsp. hispanicus	LC
Carduncellus hispanicus subsp. intercedens	NE
Carduus asturicus	LC
Carduus broteri	LC
Carduus carlinoides subsp. hispanicus	NT
Carduus carpetanus subsp. braun-blanquetii	NE
Carduus carpetanus subsp. carpetanus	LC
Carduus ibicensis	LC
Carduus meonanthus subsp. valentinus	LC
Carduus nigrescens subsp. hispanicus	LC
Carduus paui	NT
Carduus platypus subsp. granatensis	LC
Carduus platypus subsp. platypus	NT
Carduus rivasgodayanus	EN
Carduus santacreui	EN
Carex asturica	LC
Carex camposii	LC
Carex caudata	NT
Carex durieui	NT
Carex reuteriana subsp. reuteriana	LC
Carex reuteriana subsp. mauritanica	LC
Carex furva	NT
Carex lainzii	EN
Carex macrostyla	LC
Carex nevadensis	LC
Carex rorulenta	LC
Centaurea alba subsp. alba	LC
Centaurea alba subsp. aristifera	NE
Centaurea alba subsp. tartesiana	VU
Centaurea amblensis subsp. amblensis	LC
Centaurea amblensis subsp. tentudaica	VU
Centaurea antennata subsp. antennata	NE
Centaurea antennata subsp. meridionalis	NE
Centaurea argecillensis	NE
Centaurea aristata	LC
Centaurea aspera subsp. stenophylla	LC
Centaurea avilae	VU
Centaurea barrasii	VU
Centaurea beltrani	NE
Centaurea beturica	LC
Centaurea boissieri subsp. funkii	VU
Centaurea boissieri subsp. integrifolia	NE
Centaurea boissieri subsp. mariolensis	LC
Centaurea boissieri subsp. pinae	NT
Centaurea boissieri subsp. prostrata	LC
Centaurea boissieri subsp. willkommii	LC
Centaurea bombycina subsp. bombycina	VU
Centaurea bombycina subsp. xeranthemoides	VU
Centaurea borjae	EN
Centaurea carratracensis	EN
Centaurea castellanoides subsp. arundana	NE
Centaurea castellanoides subsp. castellanoides	NE
Centaurea castellanoides subsp. talaverae	NE
Centaurea citricolor	NT
Centaurea corcubionensis	VU
Centaurea cordubensis	LC
Centaurea costae	LC
Centaurea crocata	VU
Centaurea emigrantis	LC
Centaurea emporitana	LC
Centaurea exarata	VU
Centaurea fabregatii	LC
Centaurea gadorensis	VU
Centaurea gallaecica	VU
Centaurea genesii-lopezii	CR
Centaurea granatensis	LC
Centaurea haenseleri	EN
Centaurea hyssopifolia	NT
Centaurea jaennensis	LC
Centaurea janeri subsp. babiana	LC
Centaurea janeri subsp. janeri	NE
Centaurea kunkelii	CR
Centaurea lagascana	LC
Centaurea lainzii	CR
Centaurea langei subsp. coutinhoi	NE
Centaurea langei subsp. dominguezii	NE
Centaurea langei subsp. exilis	LC
Centaurea langei subsp. geresensis	LC
Centaurea langei subsp. kheilii	NE
Centaurea langei subsp. langei	LC
Centaurea langei subsp. rothmaleriana	NT
Centaurea legionis-septimae	LC
Centaurea limbata subsp. limbata	NE
Centaurea limbata subsp. lusitana	NE
Centaurea linifolia	LC
Centaurea lusitanica	NE
Centaurea malacitana	LC
Centaurea mariana	VU
Centaurea molesworthiae	NE
Centaurea nigra subsp. carpetana	LC
Centaurea nigra subsp. rivularis	NT
Centaurea occasus	VU
Centaurea ornata	LC
Centaurea paniculata subsp. oscensis	NE
Centaurea paui	EN
Centaurea pinnata	NT
Centaurea podospermifolia	NT
Centaurea prolongoi	VU
Centaurea pulvinata	VU
Centaurea resupinata subsp. dufourii	LC
Centaurea rouyi	LC
Centaurea sagredoi	VU
Centaurea saxicola	NT
Centaurea saxifraga	CR
Centaurea schousboei	LC
Centaurea stuessyi	NE
Centaurea susannae	NE
Centaurea toletana	LC
Centaurea ultreiae	CR
Centaurium grandiflorum subsp. majus	LC
Centaurium quadrifolium subsp. linariifolium	LC
Centaurium quadrifolium subsp. quadrifolium	LC
Centaurium somedanum	VU
Cephalaria boetica	NT
Cephalaria linearifolia	LC
Cephalaria squamiflora subsp. balearica	NT
Cerastium pyrenaicum	LC
Chaenorhinum crassifolium subsp. cadevallii	LC
Chaenorhinum crassifolium subsp. crassifolium	LC
Chaenorhinum formenterae	NT
Chaenorhinum glareosum	LC
Chaenorhinum grandiflorum subsp. carthaginense	NT
Chaenorhinum grandiflorum subsp. grandiflorum	NT
Chaenorhinum macropodum subsp. degenii	LC
Chaenorhinum macropodum subsp. macropodum	LC
Chaenorhinum origanifolium subsp. cotiellae	VU
Chaenorhinum origanifolium subsp. rodriguezii	EN
Chaenorhinum raveyi	LC
Chaenorhinum reyesii	LC
Chaenorhinum robustum	LC
Chaenorhinum segoviense subsp. segoviense	LC
Chaenorhinum segoviense subsp. semiglabrum	LC
Chaenorhinum serpyllifolium subsp. lusitanicum	EN
Chaenorhinum serpyllifolium subsp. serpyllifolium	LC
Chaenorhinum tenellum	NT
Chamaespartium undulatum	VU
Cheirolophus uliginosus	CR
Cirsium acaulon subsp. gregarium	NE
Cirsium carniolicum subsp. rufescens	LC
Cirsium gaditanum	LC
Cirsium glabrum	NT
Cirsium richterianum subsp. costae	NT
Cirsium richterianum subsp. giraudiasii	LC
Cirsium richterianum subsp. richterianum	LC
Cirsium rosulatum	VU
Cirsium valentinum	LC
Cirsium welwitschii	EN
Cistus clusii subsp. multiflorus	VU
Cistus heterophyllus subsp. carthaginensis	CR
Cistus ladanifer subsp. sulcatus	LC
Cistus libanotis	NT
Clematis campaniflora	LC
Clypeola eriocarpa	CR
Cochlearia aragonensis subsp. aragonensis	VU
Cochlearia aragonensis subsp. navarrana	VU
Cochlearia glastifolia	LC
Coincya longirostra	EN
Coincya monensis subsp. nevadensis	NT
Coincya monensis subsp. puberula	DD
Coincya rupestris subsp. leptocarpa	CR
Coincya rupestris subsp. rupestris	VU
Coincya transtagana	LC
Colchicum multiflorum	LC
Colutea hispanica	LC
Conopodium arvense	LC
Conopodium bunioides	NT
Conopodium majus subsp. marizianum	LC
Conopodium pyrenaeum	LC
Conopodium subcarneum	LC
Conopodium thalictrifolium	LC
Convolvulus boissieri	LC
Convolvulus fernandesii	EN
Coris hispanica	VU
Coronopus navasii	EN
Cotoneaster granatensis	LC
Crocus cambessedesii	NT
Crocus carpetanus	LC
Crocus clusii	LC
Cymbalaria fragilis	CR
Cynara algarbiensis	VU
Cynara baetica subsp. baetica	VU
Cynara tournefortii	CR
Cynoglossum melananthum	LC
Cytisus commutatus	LC
Cytisus fontanesii subsp. plumosus	EN
Cytisus galianoi	NT
Cytisus grandiflorus subsp. cabezudoi	VU
Cytisus malacitanus	NT
Cytisus multiflorus	LC
Cytisus scoparius subsp. reverchonii	LC
Daphne rodriguezii	VU
Daucus arcanus	EN
Daucus carota subsp. cantabricus	LC
Daucus carota subsp. halophilus	NE
Daucus carota subsp. majoricus	NT
Delphinium bolosii	EN
Delphinium emarginatum subsp. nevadense	VU
Delphinium montanum	VU
Dethawia splendens subsp. cantabrica	VU
Dethawia splendens subsp. splendens	NT
Dianthus algetanus subsp. algetanus	LC
Dianthus algetanus subsp. turolensis	LC
Dianthus boissieri	LC
Dianthus broteri	LC
Dianthus charidemi	VU
Dianthus cintranus subsp. barbatus	NT
Dianthus cintranus subsp. cintranus	EN
Dianthus costae	NT
Dianthus crassipes	LC
Dianthus gredensis	NT
Dianthus langeanus	LC
Dianthus laricifolius subsp. caespitosifolius	VU
Dianthus laricifolius subsp. laricifolius	NT
Dianthus laricifolius subsp. marizii	LC
Dianthus laricifolius subsp. merinoi	LC
Dianthus legionensis	LC
Dianthus multiaffinis	VU
Dianthus multiceps subsp. multiceps	LC
Dianthus multiceps subsp. praepyrenaicus	VU
Dianthus pungens subsp. hispanicus	LC
Dianthus pyrenaicus subsp. pyrenaicus	LC
Dianthus seguieri subsp. requienii	LC
Dianthus toletanus	NT
Dianthus vigoi	LC
Dictamnus hispanicus	LC
Digitalis mariana subsp. heywoodii	VU
Digitalis mariana subsp. mariana	LC
Digitalis minor	LC
Digitalis obscura subsp. obscura	LC
Digitalis parviflora	LC
Digitalis purpurea subsp. amandiana	NE
Digitalis purpurea subsp. toletana	LC
Digitalis thapsi	LC
Diplotaxis harra subsp. lagascana	LC
Diplotaxis ibicensis	LC
Diplotaxis ilorcitana	LC
Diplotaxis siifolia subsp. vicentina	VU
Diplotaxis virgata subsp. virgata	LC
Dipsacus comosus	LC
Distichoselinum tenuifolium	LC
Dorycnium fulgurans	EN
Draba aizoides subsp. cantabriae	NT
Draba dedeana	LC
Draba hispanica subsp. laderoi	NT
Draba hispanica subsp. lebrunii	EN
Draba subnivalis	NT
Draba tomentosa subsp. ciliigera	NT
Echinospartum algibicum	CR
Echinospartum barnadesii	LC
Echinospartum boissieri	LC
Echinospartum ibericum	LC
Echium albicans subsp. albicans	LC
Echium albicans subsp. fruticescens	LC
Echium cantabricum	DD
Echium lusitanicum	LC
Echium rosulatum subsp. davaei	NE
Echium rosulatum subsp. rosulatum	LC
Echium salmanticum	LC
Elaeoselinum asclepium subsp. millefolium	NT
Endressia castellana	LC
Endressia pyrenaica	LC
Epipactis cardina	LC
Erica andevalensis	VU
Erucastrum virgatum subsp. baeticum	LC
Erucastrum virgatum subsp. brachycarpum	LC
Erucastrum virgatum subsp. pseudosinapis	LC
Eryngium duriaei	LC
Eryngium galioides	LC
Eryngium grosii	EN
Eryngium huteri	VU
Erysimum baeticum	LC
Erysimum cazorlense	VU
Erysimum duriaei	NT
Erysimum fitzii	VU
Erysimum gomezcampoi	LC
Erysimum gorbeanum	LC
Erysimum incanum subsp. aurigeranum	LC
Erysimum lagascae	NT
Erysimum linifolium	NT
Erysimum mediohispanicum	LC
Erysimum merxmuelleri	LC
Erysimum myriophyllum	VU
Erysimum nevadense	LC
Erysimum popovii	NT
Erysimum rondae	VU
Erysimum seipkae	LC
Euphorbia boetica	LC
Euphorbia fontqueriana	CR
Euphorbia isatidifolia	LC
Euphorbia maresii subsp. balearica	VU
Euphorbia maresii subsp. maresii	VU
Euphorbia margalidiana	CR
Euphorbia matritensis	LC
Euphorbia minuta subsp. minuta	LC
Euphorbia nevadensis subsp. aragonensis	LC
Euphorbia nevadensis subsp. bolosii	LC
Euphorbia nevadensis subsp. nevadensis	NT
Euphorbia oxyphylla	NT
Euphorbia paniculata subsp. monchiquensis	NE
Euphorbia paniculata subsp. welwitschii	NE
Euphorbia pedroi	EN
Euphorbia polygalifolia subsp. hirta	LC
Euphorbia polygalifolia subsp. polygalifolia	LC
Euphorbia pyrenaica	LC
Euphorbia transtagana	EN
Euphorbia uliginosa	CR
Euzomodendron bourgaeanum	VU
Ferula communis subsp. cardonae	EN
Ferula communis subsp. catalaunica	LC
Ferula loscosii	VU
Ferulago brachyloba	LC
Ferulago capillaris	LC
Ferulago granatensis	LC
Ferulago ternatifolia	VU
Flueggea tinctoria	LC
Fritillaria caballeroi	VU
Fritillaria legionensis	VU
Fritillaria pyrenaica	LC
Fritillaria stenophylla	VU
Fumana baetica	NT
Fumana hispidula	LC
Fumana lacidulemiensis	EN
Fumana paradoxa	LC
Galeopsis ladanum subsp. carpetana	LC
Galeopsis pyrenaica	LC
Galium balearicum	NT
Galium belizianum	VU
Galium boissierianum	VU
Galium brockmannii	LC
Galium broterianum	LC
Galium cespitosum	LC
Galium crespianum	NT
Galium erythrorrhizon	NT
Galium friedrichii	EN
Galium glaucum subsp. australe	NT
Galium glaucum subsp. murcicum	LC
Galium idubedae	NT
Galium lucidum subsp. fruticescens	LC
Galium moralesianum	DD
Galium nevadense	NT
Galium papillosum subsp. helodes	LC
Galium pruinosum	DD
Galium pulvinatum	EN
Galium pyrenaicum	LC
Galium rosellum	VU
Galium talaveranum	LC
Galium valentinum	LC
Galium viridiflorum	EN
Genista berberidea	LC
Genista cinerascens	LC
Genista dorycnifolia	NT
Genista falcata	LC
Genista haenseleri	EN
Genista hirsuta subsp. hirsuta	LC
Genista hystrix	LC
Genista jimenezii	LC
Genista legionensis	LC
Genista longipes subsp. longipes	LC
Genista longipes subsp. viciosoi	VU
Genista majorica	EN
Genista micrantha	LC
Genista obtusiramea	LC
Genista polyanthos	LC
Genista pumila subsp. pumila	LC
Genista pumila subsp. rigidissima	LC
Genista sanabrensis	NT
Genista teretifolia	LC
Genista tournefortii subsp. tournefortii	LC
Genista umbellata subsp. equisetiformis	LC
Genista valdes-bermejoi	VU
Genista valentina	LC
Genista versicolor	LC
Gentiana angustifolia subsp. corbariensis	NT
Gentiana boryi	VU
Gentiana burseri subsp. burseri	VU
Gentiana lutea subsp. montserratii	LC
Gentiana sierrae	VU
Geranium cazorlense	CR
Geranium dolomiticum	CR
Geranium pyrenaicum subsp. lusitanicum	NT
Geranium subargenteum	NT
Geum pyrenaicum	LC
Glandora diffusa	LC
Glandora nitida	EN
Glandora oleifolia	VU
Globularia fuxeensis	LC
Globularia majoricensis	VU
Globularia spinosa	LC
Gratiola linifolia	LC
Guillonea scabra subsp. canescens	EN
Guillonea scabra subsp. scabra	LC
Guiraoa arvensis	LC
Gypsophila bermejoi	NT
Gypsophila montserratii	VU
Gypsophila struthium subsp. hispanica	LC
Gypsophila struthium subsp. struthium	LC
Gypsophila tomentosa	LC
Gyrocaryum oppositifolium	CR
Halimium atriplicifolium subsp. atriplicifolium	LC
Haplophyllum bastetanum	CR
Haplophyllum linifolium subsp. linifolium	LC
Haplophyllum rosmarinifolium	LC
Hedera helix subsp. rhizomatifera	LC
Hedera maderensis subsp. iberica	LC
Hedysarum boveanum subsp. costaetalentii	VU
Hedysarum boveanum subsp. palentinum	VU
Helianthemum almeriense	LC
Helianthemum alypoides	VU
Helianthemum apenninum subsp. cantabricum	LC
Helianthemum apenninum subsp. cavanillesianum	LC
Helianthemum apenninum subsp. estevei	VU
Helianthemum apenninum subsp. suffruticosum	LC
Helianthemum apenninum subsp. urrielense	VU
Helianthemum asperum subsp. asperum	LC
Helianthemum cinereum subsp. cinereum	LC
Helianthemum cinereum subsp. guadiccianum	NT
Helianthemum cinereum subsp. hieronymi	EN
Helianthemum marifolium subsp. andalusicum	LC
Helianthemum marifolium subsp. conquense	VU
Helianthemum marifolium subsp. frigidulum	VU
Helianthemum marifolium subsp. molle	NT
Helianthemum pannosum	VU
Helianthemum polygonoides	CR
Helianthemum viscidulum subsp. raynaudii	EN
Helianthemum viscidulum subsp. viscidulum	NT
Helleborus lividus subsp. lividus	NT
Herniaria algarvica	EN
Herniaria baetica	LC
Herniaria boissieri subsp. boissieri	NT
Herniaria fruticosa	LC
Herniaria latifolia	LC
Herniaria lusitanica subsp. berlengiana	EN
Herniaria lusitanica subsp. lusitanica	LC
Herniaria maritima	NE
Herniaria scabrida subsp. guadarramica	NT
Hippocrepis balearica	VU
Hippocrepis bourgaei	LC
Hippocrepis carpetana	NT
Hippocrepis castroviejoi	VU
Hippocrepis commutata	LC
Hippocrepis eriocarpa	VU
Hippocrepis fruticescens	LC
Hippocrepis grosii	EN
Hippocrepis nevadensis	VU
Hippocrepis prostrata	CR
Hippocrepis rupestris	LC
Hippocrepis scabra	LC
Hippocrepis squamata	LC
Hippocrepis tavera-mendozae	CR
Hippocrepis valentina	LC
Hormathophylla baetica	VU
Hormathophylla cadevalliana	VU
Hormathophylla longicaulis	LC
Hormathophylla purpurea	VU
Hormathophylla reverchonii	EN
Hornungia petraea subsp. aragonensis	NT
Hugueninia tanacetifolia subsp. suffruticosa	DD
Hyacinthoides hispanica	LC
Hyacinthoides paivae	NT
Hyacinthoides reverchonii	VU
Hypericum balearicum	LC
Hypericum caprifolium	LC
Hypericum ericoides subsp. ericoides	LC
Hypericum hircinum subsp. cambessedesii	VU
Hypericum richeri subsp. burseri	LC
Iberis bernardiana	VU
Iberis carnosa subsp. embergeri	EN
Iberis carnosa subsp. granatensis	LC
Iberis carnosa subsp. hegelmaieri	LC
Iberis carnosa subsp. nafarroana	DD
Iberis ciliata subsp. welwitschii	EN
Iberis fontqueri	VU
Iberis grosii	VU
Iberis nazarita	NT
Iberis pectinata	LC
Iberis procumbens subsp. microcarpa	LC
Iberis procumbens subsp. procumbens	LC
Iberis saxatilis subsp. cinerea	LC
Iberis spathulata	LC
Isatis platyloba	VU
Jasione cavanillesii	VU
Jasione crispa subsp. crispa	LC
Jasione crispa subsp. mariana	LC
Jasione crispa subsp. tomentosa	LC
Jasione crispa subsp. tristis	NT
Jasione mansanetiana	EN
Jasione penicillata	VU
Jonopsidium abulense	LC
Jonopsidium acaule	LC
Juncus emmanuelis	LC
Juncus rugosus	LC
Jurinea fontqueri	CR
Jurinea pinnata	LC
Kernera boissieri	VU
Klasea algarbiensis	VU
Klasea boetica subsp. lusitanica	NE
Klasea flavescens subsp. flavescens	DD
Klasea flavescens subsp. leucantha	DD
Klasea integrifolia subsp. integrifolia	EN
Klasea integrifolia subsp. monardii	NE
Klasea legionensis	EN
Knautia lebrunii	LC
Knautia legionensis	LC
Knautia numantina	NT
Knautia rupicola	LC
Knautia subscaposa	LC
Lafuentea rotundifolia	LC
Lamium coutinhoi	NE
Lamium gevorense	LC
Laserpitium eliasii subsp. eliasii	LC
Laserpitium eliasii subsp. ordunae	EN
Laserpitium eliasii subsp. thalictrifolium	NT
Laserpitium gallicum subsp. majoricum	EN
Laserpitium gallicum subsp. orospedanum	NT
Laserpitium gallicum subsp. paradoxum	LC
Laserpitium latifolium subsp. merinoi	VU
Laserpitium latifolium subsp. nevadense	CR
Laserpitium longiradium	CR
Laserpitium nestleri subsp. flabellatum	LC
Laserpitium nestleri subsp. lainzii	VU
Lathyrus nudicaulis	LC
Lavandula lanata	LC
Lavandula stoechas subsp. luisieri	LC
Lavatera oblongifolia	VU
Lepidium cardamines	LC
Lepidium petrophilum	LC
Lepidium stylatum	LC
Lepidium villarsii subsp. anticarium	VU
Leucojum valentinum	VU
Ligusticum lucidum subsp. huteri	CR
Lilium pyrenaicum	LC
Limonium album	VU
Limonium alcudianum	LC
Limonium angustebracteatum	LC
Limonium antonii-llorensii	EN
Limonium aragonense	CR
Limonium artruchium	EN
Limonium balearicum	VU
Limonium bianorii	NT
Limonium biflorum	NT
Limonium binervosum	NT
Limonium boirae	CR
Limonium bonafei	EN
Limonium caesium	NT
Limonium camposanum	NT
Limonium caprariense	VU
Limonium carpetanicum	VU
Limonium carregadorense	EN
Limonium carthaginense	VU
Limonium catalaunicum	CR
Limonium cavanillesii	VU
Limonium cofrentanum	DD
Limonium connivens	NT
Limonium cossonianum	LC
Limonium costae	LC
Limonium daveaui	CR
Limonium delicatulum	LC
Limonium dichotomum	LC
Limonium dragonericum	EN
Limonium dufourii	CR
Limonium ebusitanum	NT
Limonium erectum	EN
Limonium estevei	CR
Limonium fontqueri	VU
Limonium furfuraceum	LC
Limonium geronense	VU
Limonium gibertii	NT
Limonium grosii	EN
Limonium gymnesicum	VU
Limonium heterospicatum	NT
Limonium hibericum	LC
Limonium insigne	LC
Limonium latebracteatum	LC
Limonium laxiusculum	EN
Limonium lobetanicum	DD
Limonium longebracteatum	VU
Limonium magallufianum	CR
Limonium majoricum	NT
Limonium majus	EN
Limonium malacitanum	CR
Limonium marisolii	VU
Limonium migjornense	CR
Limonium minoricense	LC
Limonium minus	EN
Limonium minutum	VU
Limonium multiflorum	VU
Limonium muradense	LC
Limonium orellii	NT
Limonium parvibracteatum	LC
Limonium paui	VU
Limonium plurisquamatum	VU
Limonium portopetranum	LC
Limonium pseudarticulatum	EN
Limonium pseudebusitanum	EN
Limonium pseudodictyocladum	CR
Limonium quesadense	EN
Limonium retusum	NE
Limonium revolutum	VU
Limonium rigualii	VU
Limonium ruizii	VU
Limonium santapolense	VU
Limonium saxicola	LC
Limonium scorpioides	EN
Limonium soboliferum	CR
Limonium squarrosum	CR
Limonium stenophyllum	VU
Limonium subglabrum	EN
Limonium sucronicum	VU
Limonium supinum	LC
Limonium tabernense	VU
Limonium tamarindanum	EN
Limonium tenuicaule	LC
Limonium thiniense	VU
Limonium toletanum	VU
Limonium tournefortii	DD
Limonium tremolsii	NT
Limonium ugijarense	EN
Limonium validum	NT
Limonium viciosoi	DD
Limonium wiedmannii	VU
Linaria accitensis	DD
Linaria aeruginea subsp. aeruginea	LC
Linaria aeruginea subsp. cardonica	LC
Linaria aeruginea subsp. nevadensis	DD
Linaria aeruginea subsp. pruinosa	NT
Linaria algarviana	NT
Linaria alpina subsp. filicaulis	NT
Linaria amethystea subsp. amethystea	LC
Linaria amethystea subsp. ignescens	LC
Linaria amethystea subsp. multipunctata	NE
Linaria amoi	VU
Linaria badalii	LC
Linaria bipunctata subsp. bipunctata	LC
Linaria bipunctata subsp. glutinosa	LC
Linaria bubanii	LC
Linaria caesia	NT
Linaria cavanillesii	LC
Linaria clementei	VU
Linaria depauperata subsp. depauperata	LC
Linaria depauperata subsp. hegelmaieri	VU
Linaria depauperata subsp. ilergabona	LC
Linaria diffusa	NE
Linaria elegans	LC
Linaria glacialis	VU
Linaria glauca subsp. glauca	LC
Linaria glauca subsp. olcadium	LC
Linaria hirta	LC
Linaria huteri	VU
Linaria incarnata	NT
Linaria intricata	VU
Linaria nigricans	EN
Linaria nivea	LC
Linaria oblongifolia subsp. aragonensis	LC
Linaria oblongifolia subsp. benitoi	CR
Linaria oblongifolia subsp. haenseleri	LC
Linaria oblongifolia subsp. oblongifolia	LC
Linaria oligantha subsp. oligantha	LC
Linaria oligantha subsp. valentina	VU
Linaria orbensis	EN
Linaria platycalyx	VU
Linaria polygalifolia subsp. aguillonensis	EN
Linaria polygalifolia subsp. lamarckii	EW
Linaria polygalifolia subsp. polygalifolia	NT
Linaria propinqua	NT
Linaria ricardoi	EN
Linaria salzmannii	NT
Linaria saturejoides subsp. angustealata	NT
Linaria saturejoides subsp. saturejoides	LC
Linaria saxatilis	LC
Linaria triornithophora	LC
Linaria tristis subsp. tristis	LC
Linaria tursica	VU
Linaria verticillata subsp. anticaria	LC
Linaria verticillata subsp. cuartanensis	LC
Linaria verticillata subsp. lilacina	LC
Linaria verticillata subsp. verticillata	LC
Linum appressum subsp. appressum	NE
Linum appressum subsp. commutatum	NE
Linum carratracense	NE
Linum castroviejoi	NE
Linum gaditanum	NE
Linum jimenezii subsp. jimenezii	NE
Linum jimenezii subsp. willkommii	NE
Linum marianorum subsp. arundanum	NE
Linum marianorum subsp. marianorum	NE
Linum milletii	NE
Linum narbonense subsp. barrasii	NE
Linum salsoloides	LC
Linum suffruticosum subsp. crespoi	NE
Linum suffruticosum subsp. differens	NE
Linum suffruticosum subsp. loeflingii	NE
Linum suffruticosum subsp. montserratii	NE
Linum suffruticosum subsp. suffruticosum	LC
Linum tejedense	NE
Lobularia maritima subsp. columbretensis	VU
Lomelosia pulsatilloides subsp. macropoda	LC
Lomelosia pulsatilloides subsp. pulsatilloides	VU
Lonicera pyrenaica subsp. majoricensis	VU
Lonicera splendida	LC
Lotus corniculatus subsp. carpetanus	LC
Lotus corniculatus subsp. glacialis	NT
Lotus tetraphyllus	LC
Lupinus gredensis	LC
Lupinus hispanicus	LC
Luzula caespitosa	LC
Luzula lactea	LC
Luzula multiflora subsp. monticola	LC
Lycocarpus fugax	NT
Lysimachia minoricensis	EW
Lythrum flexuosum	EN
Malva trifida	LC
Mantisalca cabezudoi	NE
Mantisalca spinulosa	NE
Matthiola perennis	LC
Medicago citrina	EN
Medicago hybrida	NT
Merendera androcymbioides	LC
Merendera montana	LC
Micromeria filiformis	LC
Minuartia campestris subsp. campestris	LC
Minuartia cerastiifolia	NT
Minuartia cymifera	NT
Minuartia valentina	VU
Moehringia fontqueri	EN
Moehringia intricata subsp. castellana	LC
Moehringia intricata subsp. intricata	CR
Moehringia intricata subsp. tejedensis	VU
Moricandia foetida	LC
Moricandia moricandioides subsp. baetica	VU
Moricandia moricandioides subsp. cavanillesiana	NT
Moricandia moricandioides subsp. giennensis	LC
Moricandia moricandioides subsp. moricandioides	LC
Murbeckiella sousae	LC
Muscari cazorlanum	VU
Muscari matritensis	LC
Myosotis alpestris subsp. pyrenaeorum	NT
Myosotis discolor subsp. rosmatina	LC
Myosotis hervei	NT
Myosotis minutiflora subsp. segobrigensis	NT
Myosotis persoonii	LC
Myosotis stolonifera	LC
Myosotis taverae	LC
Nepeta caerulea	VU
Nepeta latifolia	LC
Nepeta nepetella subsp. aragonensis	LC
Nepeta nepetella subsp. laciniata	LC
Nigella papillosa subsp. papillosa	LC
Nigritella gabasiana	LC
Nothobartsia spicata	VU
Odontitella virgata	LC
Odontites kaliformis	EN
Odontites pyrenaeus subsp. abilianus	LC
Odontites pyrenaeus subsp. pyrenaeus	LC
Odontites recordonii	NT
Odontites viscosus subsp. asturicus	EN
Odontites viscosus subsp. granatensis	CR
Omphalodes nitida	LC
Onobrychis argentea subsp. argentea	LC
Onobrychis argentea subsp. hispanica	LC
Onobrychis matritensis	LC
Onobrychis pyrenaica	VU
Onobrychis reuteri	NT
Onobrychis stenorhiza	LC
Ononis azcaratei	CR
Ononis crispa subsp. crispa	VU
Ononis hackelii	VU
Ononis tridentata subsp. angustifolia	LC
Ononis tridentata subsp. crassifolia	LC
Ononis varelae	VU
Ononis viscosa subsp. crotalarioides	LC
Onopordum corymbosum subsp. corymbosum	LC
Onopordum hinojense	NE
Onopordum nervosum	LC
Onosma bubanii	NT
Onosma fastigiata subsp. pyrenaica	LC
Onosma tricerosperma subsp. granatensis	DD
Ophrys bertolonii subsp. balearica	VU
Ophrys speculum subsp. lusitanica	LC
Orchis cazorlensis	LC
Ornithogalum concinnum	LC
Orobanche austrohispanica	LC
Orobanche ballotae	LC
Orobanche clausonis subsp. hesperina	LC
Orobanche rosmarina	LC
Ortegia hispanica	LC
Oxytropis foucaudii	NT
Oxytropis jabalambrensis	EN
Paeonia cambessedesii	NT
Papaver lapeyrousianum	DD
Paradisea lusitanica	LC
Paronychia aretioides	LC
Paronychia kapela subsp. baetica	NT
Paronychia rouyana	LC
Paronychia suffruticosa subsp. hirsuta	LC
Paronychia suffruticosa subsp. suffruticosa	LC
Pastinaca lucida	VU
Pedicularis comosa subsp. asparagoides	VU
Pedicularis mixta	LC
Pedicularis pyrenaica subsp. praetermissa	LC
Pedicularis pyrenaica subsp. pyrenaica	EN
Pedicularis schizocalyx	LC
Pedicularis verticillata subsp. caespitosa	DD
Petrocoptis crassifolia	NT
Petrocoptis grandiflora	VU
Petrocoptis guarensis	VU
Petrocoptis hispanica	LC
Petrocoptis montserratii	VU
Petrocoptis montsicciana	NT
Petrocoptis pardoi	VU
Petrocoptis pseudoviscosa	VU
Petrocoptis pyrenaica subsp. glaucifolia	LC
Petrocoptis pyrenaica subsp. pyrenaica	VU
Petrocoptis pyrenaica subsp. viscosa	EN
Peucedanum officinale subsp. brachyradium	CR
Phlomis crinita subsp. crinita	LC
Phlomis crinita subsp. malacitana	LC
Phlomis italica	VU
Pimpinella bicknellii	VU
Pimpinella espanensis	LC
Pimpinella procumbens	VU
Pimpinella siifolia	LC
Pinguicula dertosensis	VU
Pinguicula longifolia subsp. longifolia	NT
Pinguicula mundi	VU
Pinguicula nevadensis	EN
Pinguicula vallisneriifolia	VU
Pistorinia hispanica	LC
Plantago algarbiensis	CR
Plantago asperrima	DD
Plantago monosperma subsp. discolor	LC
Plantago monosperma subsp. monosperma	LC
Plantago nivalis	LC
Platycapnos tenuiloba subsp. parallela	VU
Polycarpon polycarpoides subsp. colomense	LC
Polygala edmundi	LC
Polygala microphylla	LC
Polygala vayredae	VU
Polygonum romanum subsp. balearicum	NT
Potentilla asturica	LC
Potentilla nevadensis	NT
Potentilla nivalis subsp. asturica	VU
Potentilla pyrenaica	LC
Potentilla reuteri	NT
Primula acaulis subsp. balearica	NT
Primula elatior subsp. lofthousei	VU
Pritzelago alpina subsp. auerswaldii	LC
Prunus ramburii	VU
Pseudomisopates rivas-martinezii	CR
Pseudoscabiosa saxatilis	LC
Pterocephalidium diandrum	LC
Pterocephalus spathulatus	LC
Pterospartum tridentatum subsp. tridentatum	LC
Ptilostemon hispanicus	LC
Pycnocomon intermedium	LC
Quercus petraea subsp. huguetiana	LC
Ramonda myconi	LC
Ranunculus abnormis	NT
Ranunculus acetosellifolius	NT
Ranunculus amplexicaulis	LC
Ranunculus angustifolius	LC
Ranunculus barceloi	VU
Ranunculus bulbosus subsp. aleae	LC
Ranunculus bulbosus subsp. castellanus	NT
Ranunculus bupleuroides	VU
Ranunculus carlittensis	LC
Ranunculus envalirensis	LC
Ranunculus gouanii	LC
Ranunculus gregarius	LC
Ranunculus henriquesii	VU
Ranunculus longipes	LC
Ranunculus malessanus	NT
Ranunculus montserratii	CR
Ranunculus nigrescens	LC
Ranunculus ollissiponensis subsp. alpinus	NT
Ranunculus ollissiponensis subsp. ollissiponensis	LC
Ranunculus parnassiifolius subsp. cabrerensis	NT
Ranunculus parnassiifolius subsp. favargeri	VU
Ranunculus parnassiifolius subsp. parnassiifolius	LC
Ranunculus pseudomillefoliatus	LC
Ranunculus pyrenaeus	LC
Ranunculus ruscinonensis	LC
Ranunculus spicatus subsp. blepharicarpos	LC
Ranunculus valdesii	DD
Ranunculus weyleri	VU
Reseda barrelieri	LC
Reseda complicata	VU
Reseda glauca	LC
Reseda gredensis	NT
Reseda lutea subsp. vivantii	NT
Reseda paui subsp. almijarensis	NT
Reseda paui subsp. paui	NT
Reseda stricta subsp. funkii	LC
Reseda suffruticosa	LC
Reseda undata subsp. gayana	DD
Reseda undata subsp. leucantha	LC
Reseda undata subsp. undata	LC
Reseda virgata	LC
Rhamnus alaternus subsp. munyozgarmendiae	LC
Rhamnus ludovici-salvatoris	NT
Rhamnus lycioides subsp. borgiae	LC
Rhamnus lycioides subsp. laderoi	LC
Rhamnus lycioides subsp. lycioides	LC
Rhamnus oleoides subsp. assoana	NE
Rhamnus oleoides subsp. bourgaeana	NT
Rhamnus oleoides subsp. rivasgodayana	LC
Rhamnus pumila subsp. legionensis	VU
Rhamnus velutina subsp. almeriensis	LC
Rhaponticoides fraylensis	NT
Rhaponticum centauroides	NT
Rhaponticum longifolium	VU
Rhododendron ponticum subsp. baeticum	VU
Rorippa valdes-bermejoi	CR
Rosmarinus tomentosus	EN
Rubia balearica subsp. balearica	NT
Rubia balearica subsp. caespitosa	CR
Rubus brigantinus	VU
Rubus castellarnaui	DD
Rubus castroviejoi	DD
Rubus cyclops	DD
Rubus galloecicus	DD
Rubus henriquesii	DD
Rubus lainzii	LC
Rubus lucensis	DD
Rubus muricola	DD
Rubus pauanus	DD
Rubus peratticus	DD
Rubus sampaioanus	VU
Rubus urbionicus	DD
Rubus vagabundus	DD
Rubus vigoi	LC
Rumex acetosa subsp. biformis	LC
Rumex aquitanicus	LC
Rumex bucephalophorus subsp. hispanicus	LC
Rumex papillaris	LC
Rumex suffruticosus	LC
Sagina merinoi	LC
Salix cantabrica	LC
Salix pyrenaica	LC
Salix salviifolia	LC
Salix tarraconensis	VU
Salsola papillosa	DD
Salvia candelabrum	VU
Salvia lavandulifolia subsp. lavandulifolia	LC
Salvia lavandulifolia subsp. mariolensis	LC
Salvia lavandulifolia subsp. oxyodon	LC
Salvia lavandulifolia subsp. vellerea	LC
Salvia phlomoides subsp. boissieri	NT
Salvia phlomoides subsp. phlomoides	LC
Salvia sclareoides	LC
Salvia valentina	LC
Sanguisorba hybrida	LC
Sanguisorba lateriflora	LC
Saponaria caespitosa	LC
Sarcocapnos baetica subsp. baetica	NT
Sarcocapnos baetica subsp. integrifolia	VU
Sarcocapnos crassifolia subsp. speciosa	NT
Satureja innota	LC
Satureja intricata	LC
Saxifraga aquatica	LC
Saxifraga aretioides	NT
Saxifraga babiana	LC
Saxifraga biternata	EN
Saxifraga bourgeana	VU
Saxifraga camposii subsp. camposii	LC
Saxifraga camposii subsp. leptophylla	LC
Saxifraga canaliculata	LC
Saxifraga catalaunica	NT
Saxifraga cintrana	VU
Saxifraga conifera	LC
Saxifraga corsica subsp. cossoniana	LC
Saxifraga erioblasta	LC
Saxifraga felineri	VU
Saxifraga fragilis subsp. paniculata	LC
Saxifraga gemmulosa	VU
Saxifraga genesiana	VU
Saxifraga geranioides	LC
Saxifraga haenseleri	LC
Saxifraga hirsuta subsp. hirsuta	LC
Saxifraga hirsuta subsp. paucicrenata	LC
Saxifraga intricata	VU
Saxifraga latepetiolata	LC
Saxifraga lepismigena	LC
Saxifraga losae	LC
Saxifraga media	LC
Saxifraga moncayensis	LC
Saxifraga nevadensis	NT
Saxifraga oppositifolia subsp. paradoxa	EN
Saxifraga pentadactylis subsp. almanzorii	LC
Saxifraga pentadactylis subsp. pentadactylis	NT
Saxifraga pentadactylis subsp. willkommiana	LC
Saxifraga praetermissa	LC
Saxifraga pubescens subsp. iratiana	NT
Saxifraga pubescens subsp. pubescens	NT
Saxifraga reuteriana	NT
Saxifraga rigoi subsp. rigoi	LC
Saxifraga umbrosa	LC
Saxifraga vayredana	LC
Scabiosa andryalifolia	LC
Scabiosa galianoi	LC
Scabiosa turolensis subsp. turolensis	LC
Scandix australis subsp. brevirostris	LC
Scandix australis subsp. microcarpa	LC
Schenkia elegans	LC
Scleranthus polycnemoides	NT
Scrophularia bourgaeana	LC
Scrophularia crithmifolia	LC
Scrophularia grandiflora	LC
Scrophularia herminii	EN
Scrophularia oxyrhyncha	LC
Scrophularia pyrenaica	NT
Scrophularia reuteri	LC
Scrophularia sublyrata	CR
Scrophularia tanacetifolia	LC
Scrophularia valdesii	VU
Scrophularia viciosoi	CR
Scutellaria balearica	NT
Scutellaria orientalis subsp. hispanica	DD
Sedum arenarium	LC
Sedum candollei	LC
Sedum lagascae	LC
Sedum nevadense	LC
Sedum pedicellatum	EN
Sedum pruinatum	VU
Sempervivum minutum	LC
Sempervivum vicentei	LC
Serapias perez-chiscanoi	NT
Sesamoides prostrata	LC
Seseli cantabricum	LC
Seseli farrenyi	EN
Seseli intricatum	EN
Seseli montanum subsp. granatense	LC
Seseli montanum subsp. peixotoanum	LC
Sibthorpia africana	NT
Sideritis bourgaeana	LC
Sideritis bubanii	NT
Sideritis carbonellii	NT
Sideritis chamaedryfolia	NE
Sideritis dianica	VU
Sideritis glacialis	LC
Sideritis glauca	NT
Sideritis ibanyezii	LC
Sideritis ilicifolia	LC
Sideritis lacaitae	LC
Sideritis lasiantha	NT
Sideritis laxespicata	NT
Sideritis leucantha	LC
Sideritis lurida	NT
Sideritis montserratiana	LC
Sideritis osteoxylla	LC
Sideritis ovata	LC
Sideritis paulii	NT
Sideritis pungens	LC
Sideritis reverchonii	EN
Sideritis serrata	CR
Sideritis spinulosa	NT
Sideritis stachydioides	VU
Sideritis tragoriganum	LC
Silene acutifolia	NT
Silene almolae	LC
Silene borderei	LC
Silene cambessedesii	VU
Silene cintrana	NT
Silene coutinhoi	LC
Silene diclinis	EN
Silene fernandezii	EN
Silene foetida subsp. foetida	EN
Silene foetida subsp. gayana	EN
Silene gaditana	VU
Silene germana	LC
Silene hifacensis	VU
Silene inaperta subsp. serpentinicola	EN
Silene legionensis	LC
Silene littorea subsp. adscendens	VU
Silene longicilia	LC
Silene mariana	NT
Silene marizii	CR
Silene mellifera	LC
Silene mollissima	NT
Silene psammitis subsp. psammitis	LC
Silene rothmaleri	NT
Silene scabriflora subsp. gallaecica	EN
Silene scabriflora subsp. megacalycina	DD
Silene sennenii	EN
Silene stockenii	CR
Silene tomentosa	EN
Sisymbrella aspera subsp. praeterita	LC
Sisymbrium assoanum	LC
Sisymbrium austriacum subsp. contortum	LC
Sisymbrium cavanillesianum	NT
Soldanella alpina subsp. cantabrica	VU
Soldanella villosa	VU
Solenanthus reverchonii	CR
Solenopsis balearica	LC
Spergula viscosa	VU
Spergularia australis	VU
Spergularia capillacea	LC
Spiraea crenata subsp. parvifolia	EN
Staehelina baetica	LC
Stauracanthus genistoides	LC
Succisa pinnatifida	CR
Succisella andreae-molinae	EN
Succisella carvalhoana	VU
Succisella microcephala	VU
Teesdaliopsis conferta	LC
Teline patens	LC
Teline tribracteolata	CR
Teucrium algarbiense	EN
Teucrium angustissimum	LC
Teucrium asiaticum	VU
Teucrium aureum subsp. turdetanum	LC
Teucrium balthazaris	NT
Teucrium bicoloreum	LC
Teucrium buxifolium	LC
Teucrium capitatum subsp. gracillimum	LC
Teucrium capitatum subsp. majoricum	NT
Teucrium carolipaui subsp. carolipaui	LC
Teucrium carolipaui subsp. fontqueri	NT
Teucrium carthaginense	NT
Teucrium charidemi	NT
Teucrium chrysotrichum	NT
Teucrium cossonii subsp. cossonii	NT
Teucrium edetanum	VU
Teucrium eriocephalum subsp. almeriense	NT
Teucrium eriocephalum subsp. eriocephalum	VU
Teucrium expassum	LC
Teucrium fragile	NT
Teucrium franchetianum	NT
Teucrium freynii	NT
Teucrium gnaphalodes	LC
Teucrium haenseleri	LC
Teucrium hieronymi	LC
Teucrium hifacense	LC
Teucrium homotrichum	LC
Teucrium intricatum	NT
Teucrium lanigerum	DD
Teucrium leonis	DD
Teucrium lepicephalum	EN
Teucrium libanitis	LC
Teucrium lusitanicum subsp. aureoforme	LC
Teucrium lusitanicum subsp. clementiae	LC
Teucrium lusitanicum subsp. lusitanicum	VU
Teucrium murcicum	LC
Teucrium oxylepis	LC
Teucrium pugionifolium	LC
Teucrium pumilum	LC
Teucrium pyrenaicum subsp. guarensis	LC
Teucrium pyrenaicum subsp. pyrenaicum	NT
Teucrium reverchonii	NT
Teucrium rivasii	NT
Teucrium rivas-martinezii	LC
Teucrium rixanense	LC
Teucrium salviastrum	LC
Teucrium similatum	LC
Teucrium terciae	VU
Teucrium thymifolium	LC
Teucrium turredanum	VU
Teucrium vincentinum	NE
Teucrium webbianum	LC
Thalictrum flavum subsp. costae	NT
Thalictrum foetidum subsp. valentinum	LC
Thalictrum macrocarpum	EN
Thalictrum maritimum	VU
Thalictrum minus subsp. matritense	LC
Thapsia gymnesica	NT
Thapsia minor	LC
Thesium catalaunicum	LC
Thlaspi nevadense	VU
Thlaspi stenopterum	LC
Thymelaea broteriana	EN
Thymelaea calycina	LC
Thymelaea coridifolia subsp. coridifolia	VU
Thymelaea coridifolia subsp. dendrobryum	LC
Thymelaea granatensis	VU
Thymelaea procumbens	NT
Thymelaea pubescens subsp. elliptica	LC
Thymelaea pubescens subsp. pubescens	LC
Thymelaea ruizii	LC
Thymelaea subrepens	VU
Thymelaea tartonraira subsp. valentina	LC
Thymelaea tinctoria subsp. nivalis	NT
Thymelaea tinctoria subsp. tinctoria	LC
Thymelaea velutina	LC
Thymus albicans	CR
Thymus antoninae	NT
Thymus baeticus	LC
Thymus bracteatus	LC
Thymus camphoratus	LC
Thymus capitellatus	LC
Thymus carnosus	CR
Thymus fontqueri	LC
Thymus funkii subsp. burilloi	VU
Thymus funkii subsp. funkii	LC
Thymus funkii subsp. sabulicola	NT
Thymus granatensis subsp. granatensis	LC
Thymus granatensis subsp. micranthus	LC
Thymus herba-barona subsp. bivalens	CR
Thymus hyemalis subsp. hyemalis	LC
Thymus hyemalis subsp. millefloris	CR
Thymus lacaitae	LC
Thymus leptophyllus subsp. izcoi	LC
Thymus leptophyllus subsp. leptophyllus	LC
Thymus leptophyllus subsp. paui	LC
Thymus longiflorus	LC
Thymus loscosii	LC
Thymus lotocephalus	NT
Thymus mastichina subsp. donyanae	NT
Thymus mastichina subsp. mastichina	LC
Thymus mastigophorus	LC
Thymus membranaceus	LC
Thymus moroderi	NT
Thymus orospedanus	LC
Thymus piperella	LC
Thymus richardii subsp. ebusitanus	VU
Thymus richardii subsp. vigoi	LC
Thymus serpylloides subsp. gadorensis	LC
Thymus serpylloides subsp. serpylloides	LC
Thymus villosus subsp. lusitanicus	NT
Thymus villosus subsp. velascoi	VU
Thymus villosus subsp. villosus	LC
Thymus vulgaris subsp. aestivus	LC
Thymus willkommii	NT
Thymus zygis subsp. sylvestris	LC
Thymus zygis subsp. zygis	LC
Trinia dufourii	LC
Ulex airensis	NE
Ulex argenteus subsp. argenteus	NE
Ulex argenteus subsp. subsericeus	VU
Ulex australis subsp. australis	NT
Ulex australis subsp. welwitschianus	NE
Ulex baeticus subsp. baeticus	VU
Ulex borgiae	LC
Ulex canescens	EN
Ulex densus	LC
Ulex erinaceus	VU
Ulex eriocladus	LC
Ulex europaeus subsp. latebracteatus	VU
Ulex gallii subsp. breoganii	NT
Ulex jussiaei	NE
Ulex micranthus	LC
Ulex parviflorus subsp. rivasgodayanus	LC
Urtica bianorii	VU
Valantia lainzii	DD
Valeriana longiflora subsp. longiflora	VU
Valeriana longiflora subsp. paui	NT
Valeriana tripteris subsp. tarraconensis	LC
Valerianella fusiformis	LC
Valerianella locusta subsp. lusitanica	LC
Valerianella martinii	NT
Valerianella multidentata	NT
Vella lucentina	EN
Vella pseudocytisus subsp. paui	EN
Vella pseudocytisus subsp. pseudocytisus	EN
Vella spinosa	LC
Verbascum barnadesii	NT
Verbascum charidemi	CR
Verbascum fontqueri	VU
Verbascum giganteum subsp. giganteum	LC
Verbascum giganteum subsp. martinezii	LC
Verbascum hervieri	DD
Verbascum litigiosum	NT
Verbascum nevadense	NT
Verbascum prunellii	DD
Verbascum rotundifolium subsp. ripacurcicum	NT
Veronica aragonensis	LC
Veronica chamaepithyoides	CR
Veronica fruticans subsp. cantabrica	LC
Veronica mampodrensis	LC
Veronica micrantha	VU
Veronica nevadensis	NT
Veronica nummularia	LC
Veronica orsiniana	LC
Veronica ponae	LC
Veronica sennenii	LC
Veronica tenuifolia subsp. fontqueri	CR
Veronica tenuifolia subsp. javalambrensis	LC
Veronica tenuifolia subsp. tenuifolia	VU
Vicia argentea	VU
Vicia bifoliolata	CR
Vicia glauca subsp. giennensis	VU
Viola cazorlensis	VU
Viola cornuta	LC
Viola crassiuscula	NT
Viola diversifolia	EN
Viola jaubertiana	NT
Viola langeana	LC
Viola montcaunica	LC
Viola willkommii	LC
Xatardia scabra	LC
Xiphion boissieri	CR
Xiphion filifolium	LC
Xiphion latifolium	LC
Xiphion serotinum	LC
Xolantha brevipes	VU
Xolantha globulariifolia	LC
Ziziphora aragonensis	NT
Andryala cintrana	NE
Avellara fistulosa	CR
Cicerbita muralis subsp. gaditana	NE
Crepis bermejana	NE
Crepis granatensis	EN
Crepis novoana	CR
Crepis oporinoides	VU
Crepis triasii	NT
Helminthotheca spinosa	NE
Hieracium andurense	VU
Hieracium aragonense	LC
Hieracium bombycinum	LC
Hieracium bourgaei	DD
Hieracium candidum	LC
Hieracium elisaeanum	LC
Hieracium erosulum	LC
Hieracium gymnocerinthe	LC
Hieracium lainzii	DD
Hieracium laniferum	DD
Hieracium mixtum	LC
Hieracium neocerinthe	NE
Hieracium ramondii	NT
Hieracium recoderi	CR
Hieracium spathulatum	LC
Hispidella hispanica	LC
Hypochaeris radicata subsp. rocinensis	NE
Lactuca perennis subsp. granatensis	VU
Launaea cervicornis	LC
Leontodon boryi	NT
Leontodon caroliaedoi	NE
Leontodon farinosus	VU
Leontodon hispidus subsp. bourgaeanus	NT
Pilosella breviscapa	LC
Pilosella galiciana	LC
Pilosella lactocantabrica	NE
Pilosella leptobrachia	NE
Pilosella vahlii	LC
Rothmaleria granatensis	VU
Scorzonera albicans	LC
Scorzonera baetica	LC
Scorzonera reverchonii	NT
Scorzoneroides carpetana subsp. carpetana	LC
Scorzoneroides carpetana subsp. duboisii	NT
Scorzoneroides carpetana subsp. nevadensis	LC
Scorzoneroides microcephala	EN
Scorzoneroides pyrenaica subsp. cantabrica	NT
Sonchus bulbosus subsp. willkommii	NT
Sonchus crassifolius	LC
Taraxacum andorriense	LC
Taraxacum aragonicum	DD
Taraxacum ayllonense	LC
Taraxacum cantabricum	LC
Taraxacum columnare	LC
Taraxacum decastroi	LC
Taraxacum duriense	LC
Taraxacum estrelense	LC
Taraxacum gaditanum	CR
Taraxacum glandiforme	DD
Taraxacum hispanicum	DD
Taraxacum iberanthum	CR
Taraxacum infradentatum	LC
Taraxacum lacianense	LC
Taraxacum litophyllum	DD
Taraxacum majoricense	CR
Taraxacum malato-belizii	DD
Taraxacum marginellum	LC
Taraxacum mimuloides	LC
Taraxacum navacerradense	DD
Taraxacum nevadense	NT
Taraxacum penyalarense	LC
Taraxacum pinto-silvae	DD
Taraxacum praesigne	DD
Taraxacum pyrenaicum	DD
Taraxacum tarraconense	VU
Taraxacum teres	EN
Taraxacum triforme	VU
Taraxacum vinosum	CR
Thrincia lusitanica	NE
Thrincia maroccana subsp. ribatejana	NE
Tragopogon castellanus	LC
Tragopogon cazorlanus	LC
Tragopogon lainzii	LC
Tragopogon pseudocastellanus	CR
Achillea ceretanica	LC
Achillea chamaemelifolia	LC
Adenostyles alpina subsp. pyrenaica	LC
Anthemis alpestris	LC
Anthemis bourgaei	EN
Anthemis funkii	EX
Anthemis pedunculata subsp. turolensis	LC
Artemisia aethiopica	LC
Artemisia assoana	LC
Artemisia granatensis	CR
Aster aragonensis	LC
Aster pyrenaeus	VU
Aster willkommii	LC
Bellis cordifolia	EN
Bellium artrutxense	VU
Calendula suffruticosa subsp. algarbiensis	NE
Calendula suffruticosa subsp. carbonellii	LC
Calendula suffruticosa subsp. cinerea	NE
Calendula suffruticosa subsp. greuteri	LC
Calendula suffruticosa subsp. marginata	NE
Calendula suffruticosa subsp. tomentosa	NE
Calendula suffruticosa subsp. vejerensis	NE
Castrilanthemum debeauxii	CR
Cota oretana	EN
Dittrichia viscosa subsp. revoluta	NE
Doronicum carpetanum subsp. carpetanum	LC
Doronicum carpetanum subsp. kuepferi	NT
Doronicum carpetanum subsp. diazii	LC
Doronicum carpetanum subsp. pubescens	LC
Erigeron aragonensis	NE
Erigeron cabelloi	NE
Erigeron frigidus	EN
Filago petro-ianii	VU
Helichrysum crassifolium	NT
Helichrysum massanellanum	VU
Helichrysum valentinum	LC
Hymenostemma pseudanthemis	EN
Inula langeana	LC
Lepidophorum repandum	NT
Leucanthemopsis boissieri	NE
Leucanthemopsis cuneata subsp. cuneata	NT
Leucanthemopsis cuneata subsp. valdes-bermejoi	NE
Leucanthemopsis flaveola subsp. flaveola	NE
Leucanthemopsis flaveola subsp. ricoi	NE
Leucanthemopsis heywoodii	NE
Leucanthemopsis pallida subsp. pallida	LC
Leucanthemopsis pallida subsp. virescens	NT
Leucanthemopsis pectinata	LC
Leucanthemopsis pulverulenta	LC
Leucanthemopsis spathulifolia	VU
Leucanthemum ageratifolium	LC
Leucanthemum aligulatum	DD
Leucanthemum cacuminis	LC
Leucanthemum cantabricum	LC
Leucanthemum catalaunicum	LC
Leucanthemum corunnense	NE
Leucanthemum delarbrei subsp. ruscinonense	LC
Leucanthemum eliasii	NT
Leucanthemum favargeri	VU
Leucanthemum gallaecicum	EN
Leucanthemum gracilicaule	LC
Leucanthemum maestracense	NT
Leucanthemum maximum	LC
Leucanthemum montserratianum	LC
Leucanthemum pluriflorum	LC
Leucanthemum pseudosylvaticum	LC
Leucanthemum pyrenaicum	LC
Leucanthemum sylvaticum subsp. merinoi	NT
Leucanthemum sylvaticum subsp. sylvaticum	EN
Mauranthemum paludosum subsp. ebusitanum	EN
Phalacrocarpum oppositifolium subsp. anomalum	LC
Phalacrocarpum oppositifolium subsp. hoffmannseggii	NT
Phalacrocarpum oppositifolium subsp. oppositifolium	LC
Prolongoa hispanica	LC
Santolina ageratifolia	VU
Santolina benthamiana	LC
Santolina chamaecyparissus subsp. tomentosa	NE
Santolina elegans	VU
Santolina impressa	LC
Santolina melidensis	CR
Santolina magonica	LC
Santolina montiberica	NE
Santolina oblongifolia	LC
Santolina rosmarinifolia	LC
Santolina semidentata	LC
Santolina vedranensis	EN
Santolina virens	LC
Santolina viscosa	LC
Senecio boissieri	NT
Senecio carpetanus	LC
Senecio legionensis	NE
Senecio lopezii	VU
Senecio nebrodensis	LC
Senecio nevadensis	VU
Senecio petraeus	VU
Senecio pyrenaicus	LC
Senecio quinqueradiatus	VU
Senecio varicosus	NT
Tanacetum mucronulatum	NE
Tanacetum vahlii	VU
Tephroseris elodes subsp. coincyi	VU
Tephroseris elodes subsp. elodes	EN
Vogtia microphylla	LC
Agrostis canina subsp. granatensis	VU
Agrostis hesperica	LC
Agrostis tileni	LC
Neoschischkinia nebulosa	LC
Neoschischkinia truncatula subsp. durieui	LC
Anthoxanthum amarum	LC
Antinoria agrostidea subsp. natans	NT
Avellinia longiaristata	NE
Avenella stricta	NE
Chaetopogon fasciculatus subsp. prostratus	CR
Ctenopsis delicatula	LC
Dactylis glomerata subsp. juncinella	LC
Dactylis glomerata subsp. lusitanica	LC
Elymus curvifolius	LC
Elymus pungens subsp. pungens	LC
Gaudinia hispanica	VU
Helictochloa crassifolia	VU
Helictochloa gervaisii subsp. gervaisii	LC
Helictochloa murcica	LC
Helictochloa lusitanica	VU
Helictochloa pratensis subsp. amethystea	VU
Helictochloa pratensis subsp. gonzaloi	NT
Helictochloa cintrana	LC
Helictochloa hackelii	VU
Helictochloa levis	CR
Helictotrichon cantabricum	LC
Helictotrichon devesae	NE
Helictotrichon filifolium subsp. arundanum	VU
Helictotrichon sarracenorum	VU
Helictotrichon sedenense subsp. gervaisii	LC
Helictotrichon pallens	EN
Holcus annuus subsp. duriensis	DD
Holcus gayanus	NT
Holcus lanatus subsp. vaginatus	LC
Holcus mollis subsp. reuteri	NT
Holcus caespitosus	NT
Holcus grandiflorus	EN
Koeleria crassipes	LC
Koeleria filifolia	LC
Koeleria rodriguez-graciae	LC
Koeleria dasyphylla subsp. nevadensis	DD
Koeleria castellana	LC
Melica bocquetii	EN
Micropyrum patens	LC
Oreochloa confusa	LC
Periballia involucrata	LC
Phleum brachystachyum subsp. abbreviatum	VU
Poa minor subsp. nevadensis	NT
Poa legionensis	NE
Puccinellia caespitosa	LC
Puccinellia festuciformis subsp. lagascana	NE
Puccinellia hispanica	LC
Puccinellia pungens	EN
Stipa dasyvaginata	LC
Stipa eriocaulis	LC
Stipa clausa	NE
Stipa filabrensis	DD
Stipa juncea	LC
Trisetaria dufourei	NT
Trisetaria ovata	LC
Trisetaria scabriuscula	LC
Trisetum glaciale	VU
Trisetum hispidum	LC
Trisetum velutinum	LC
Vulpia fontquerana	EN
Avena strigosa subsp. agraria	NE
Festuca indigesta subsp. lagascae	NE
Festuca summilusitana	LC
Festuca segimonensis	LC
Festuca gredensis	NE
Festuca clementei	VU
Festuca reverchonii	LC
Festuca aragonensis	LC
Festuca altopyrenaica	DD
Festuca vettonica	EN
Festuca niphobia	LC
Festuca gracilior	LC
Festuca valentina	NE
Festuca michaelis	NE
Festuca brigantina subsp. brigantina	VU
Festuca brigantina subsp. actyophyta	VU
Festuca longiauriculata	NT
Festuca yvesii subsp. yvesii	LC
Festuca liviensis	LC
Festuca cagiriensis	NE
Festuca frigida	VU
Festuca glacialis	NT
Festuca rivas-martinezii subsp. rivas-martinezii	LC
Festuca rivas-martinezii subsp. rectifolia	LC
Festuca marginata subsp. alopecuroides	LC
Festuca marginata subsp. andres-molinae	LC
Festuca ochroleuca subsp. ochroleuca	NE
Festuca ampla subsp. simplex	NE
Festuca ampla subsp. transtagana	NE
Festuca henriquesii	VU
Festuca borderei	LC
Festuca querana	LC
Festuca duriotagana	LC
Festuca heterophylla subsp. braun-blanquetii	NE
Festuca pyrenaica	NT
Festuca rothmaleri	LC
Festuca paucispicula	EX
Festuca cordubensis	DD
Festuca eskia	LC
Festuca burnatii	LC
Festuca elegans subsp. merinoi	LC
Festuca baetica subsp. moleroi	NE
Festuca paniculata subsp. multispiculata	NE
Festuca paniculata subsp. fontqueri	NE
Festuca paniculata subsp. paui	NE
Festuca paniculata subsp. longiglumis	NE
Festuca paniculata subsp. macrostachys	NE
Festuca durandoi subsp. capillifolia	LC
Festuca pseudeskia	LC
Festuca greuteri subsp. greuteri	NE
Festuca greuteri subsp. camarolensis	NE
Bromus cabrerensis	VU
Bromus nervosus	NE
Bromus picoeuropeanus	DD
Bromus racemosus subsp. lusitanicus	NE
Mibora minima subsp. littorea	NE
Erodium aguilellae	NT
Erodium astragaloides	CR
Erodium boissieri	VU
Erodium carvifolium	LC
Erodium cazorlanum	VU
Erodium daucoides	LC
Erodium foetidum subsp. foetidum	NT
Erodium glandulosum	LC
Erodium macrocalyx	VU
Erodium manescavii	VU
Erodium paularense	EN
Erodium recoderi	VU
Erodium rupestre	LC
Erodium rupicola	VU
Erodium sanguis-christi	NT
Erodium reichardii	VU
Moricandia moricandioides subsp. pseudo-foetida	VU
Alyssum cacuminum	NE
Alyssum loiseleurii subsp. gallaecicum	CR
Arabis beirana	EN
Aristolochia pallida subsp. castellana	NT
Armeria alliacea subsp. loscosii	NE
Armeria arenaria subsp. burgalensis	NE
Armeria arenaria subsp. madoricola	NE
Armeria castrovalnerana	NE
Armeria filicaulis subsp. alfacarensis	VU
Armeria filicaulis subsp. nevadensis	VU
Armeria filicaulis subsp. trevenqueana	EN
Armeria rivasmartinezii	NT
Armeria trianoi	LC
Astragalus devesae	CR
Biscutella bilbitana	NE
Biscutella conquensis	NE
Biscutella dufourii	NE
Biscutella ebusitana	VU
Biscutella hozensis	VU
Biscutella maestratensis	NE
Biscutella marinae	NE
Biscutella segurae	NE
Cardamine castellana	NE
Carex spicata subsp. andresii	NE
Chaenorhinum gamezii	CR
Coronilla minima subsp. vigoi	NE
Coronilla montserratii	LC
Coronilla talaverae	EN
Cotoneaster majoricensis	CR
Cytisus insularis	EN
Dactylorhiza irenica	NE
Delphinium fissum subsp. fontqueri	LC
Delphinium mansanetianum	EN
Delphinium pentagynum subsp. formenteranum	CR
Dianthus anticarius subsp. saorinii	VU
Dianthus saetabensis subsp. contestanus	LC
Dianthus edetanus	NE
Dianthus rupicola subsp. bocchoriana	VU
Dorycnium pentaphyllum subsp. lagunae	NE
Erysimum javalambrense	NT
Erysimum portugalense	NE
Euphorbia flavicoma subsp. bermejense	CR
Euphorbia minuta subsp. moleroi	NE
Helianthemum asperum subsp. willkommii	LC
Helianthemum dianicum	NE
Helianthemum edetanum	NE
Helianthemum guerrae	EN
Helianthemum origanifolium subsp. saetabense	NE
Helianthemum scopulicolum	CR
Helianthemum tinetense	LC
Jasione montana subsp. paivae	NE
Juncus fernandez-carvajaliae	DD
Limonium alicunense	CR
Limonium carvalhoi	CR
Limonium cordovillense	VU
Limonium ejulabilis	CR
Limonium inexpectans	CR
Limonium interjectum	EN
Limonium irtaensis	CR
Limonium leonardi-llorensii	CR
Limonium mansanetianum	CR
Limonium mateoi	EN
Limonium nydeggeri	LC
Limonium perplexum	CR
Limonium pinillense	EN
Limonium rosselloi	VU
Limonium scopulorum	VU
Limonium serpentinicum	NE
Limonium silvestrei	CR
Limonium tobarrense	CR
Limonium vigoi	CR
Lotus lourdes-santiagoi	LC
Lupinus mariae-josephi	CR
[truncated: 140 more rows]
